# Supplementary material for: Reaction uniformity visualized by Raman imaging in the composite electrode layers of all-solid-state lithium batteries
Source: Royal Society of Chemistry journal article supplement (doi:10.1039/d0cp00508h), 2020-01-01
Supplement: d0cp00508h1.pdf [file d0cp00508h1.pdf]

**Supplementary Information**

**Reaction Uniformity Visualized by Raman Imaging in  
Composite Electrode Layers of All-Solid-State Lithium Batteries**

Misae Otoyama,<sup>1</sup> Yusuke Ito,<sup>1</sup> Atsushi Sakuda,<sup>1</sup>  
Masahiro Tatsumisago,<sup>1</sup> and Akitoshi Hayashi<sup>1,\*</sup>

<sup>1</sup>Department of Applied Chemistry, Graduate School of Engineering, Osaka  
Prefecture University,  
1-1 Gakuen-cho, Naka-ku, Sakai, Osaka 599-8531, Japan

**Corresponding Author**

\*Akitoshi Hayashi (Professor)

Department of Applied Chemistry, Graduate School of Engineering, Osaka Prefecture  
University, 1-1 Gakuen-cho, Naka-ku, Sakai, Osaka 599-8531, Japan

Tel.: +81-72-254-9331; Fax.: +81-72-254-9334

E-mail address: hayashi@chem.osakafu-u.ac.jp.

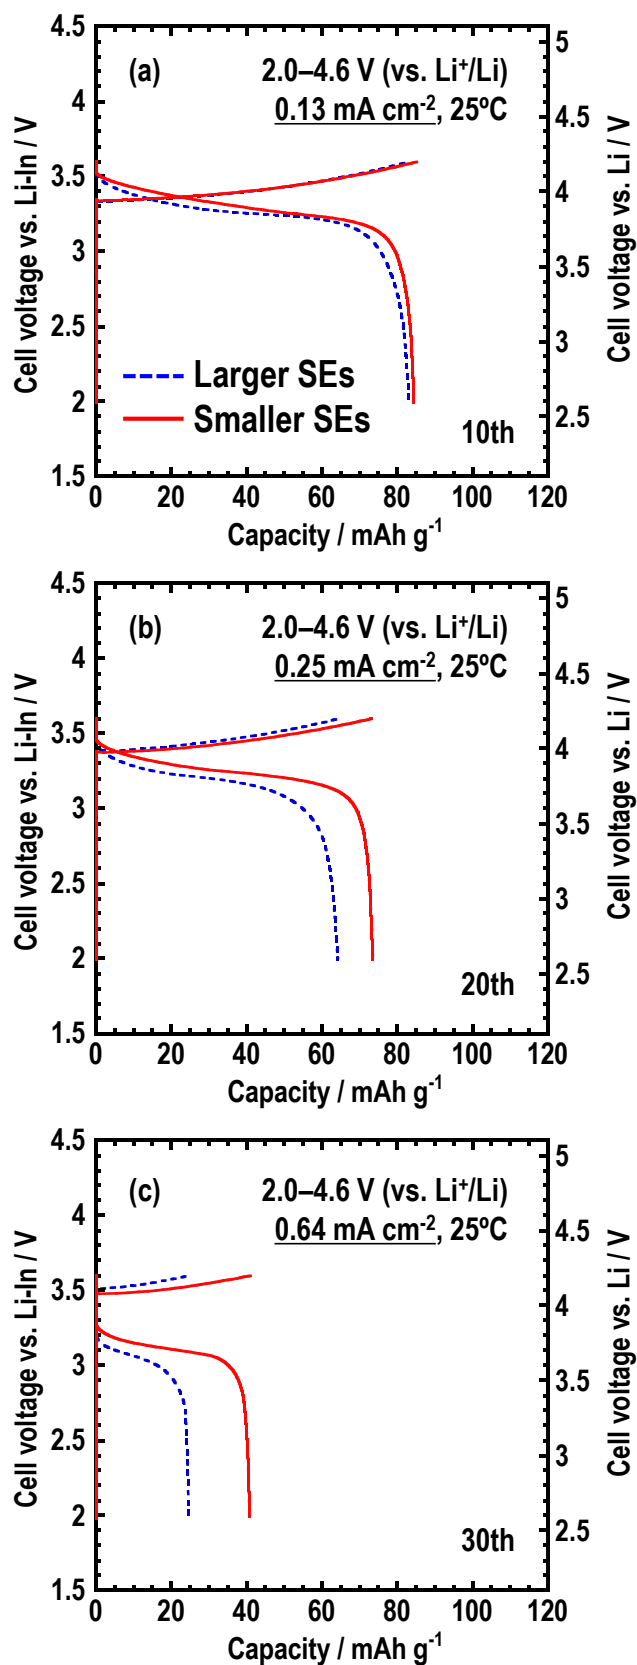

Fig. S1 (a) 10th, (b) 20th and (c) 30th charge-discharge curves in the cycle performance test shown in Fig. 2. The cells were operated under a current density of (a) 0.13, (b) 0.25 and (c) 0.64 mA cm<sup>-2</sup> at 25°C with a cut-off voltage of 2.6–4.2 V (vs. Li<sup>+</sup>/Li).

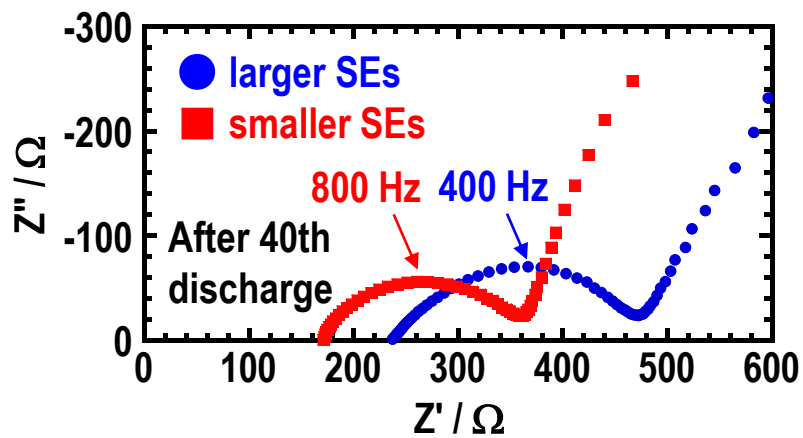

Fig. S2 Nyquist plots of the cells with larger SE and smaller SE particles after the 40th discharge test in Fig. 2.

Table S1 Abundance ratio of high SOC, low SOC and  $\text{Co}_3\text{O}_4$  areas in the Raman mapping images of the cells with larger and smaller SEs after the charge and discharge tests.

|             |            | low SOC | high SOC | $\text{Co}_3\text{O}_4$ |
|-------------|------------|---------|----------|-------------------------|
| Larger SEs  | Charged    | 14.8%   | 84.7%    | 0.5%                    |
|             | Discharged | 47.8%   | 49.6%    | 2.6%                    |
| Smaller SEs | Charged    | 2.0%    | 98.0%    | 0%                      |
|             | discharged | 97.6%   | 2.3%     | 0.1%                    |

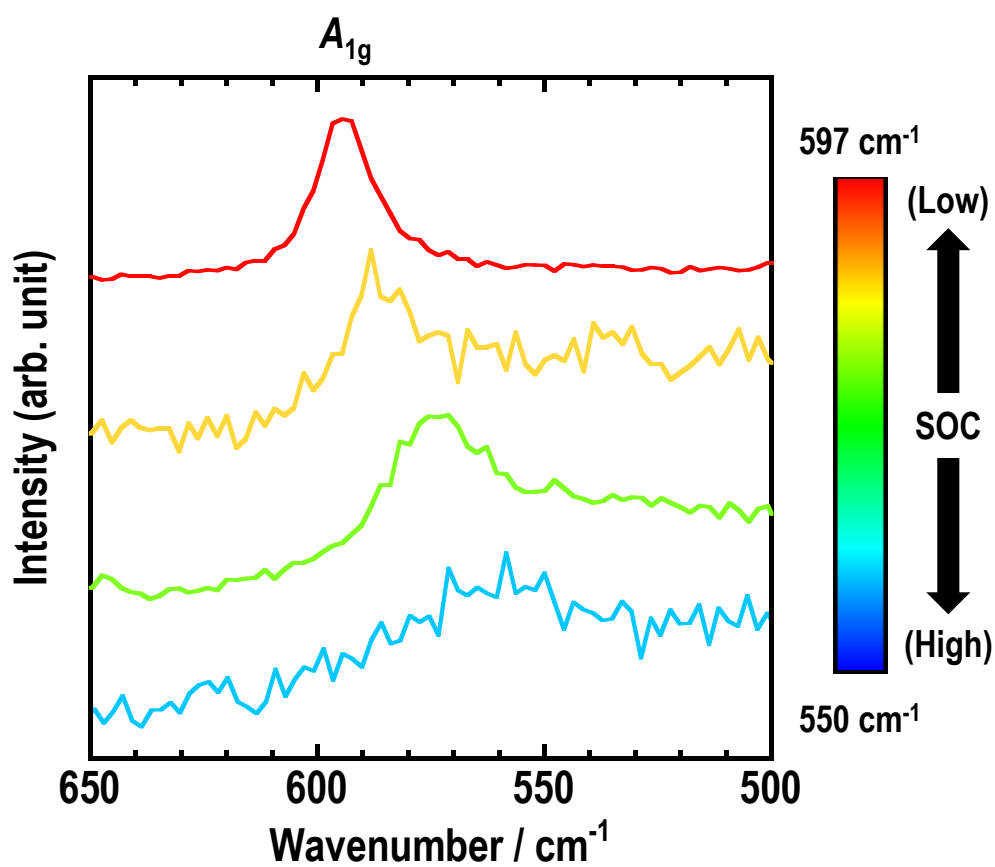

Fig. S3 Raman spectra focused on  $\text{LiCoO}_2$  Raman band attributable to the  $A_{1g}$  mode with various SOC corresponding to the color bar.

## After charge (Larger SEs)

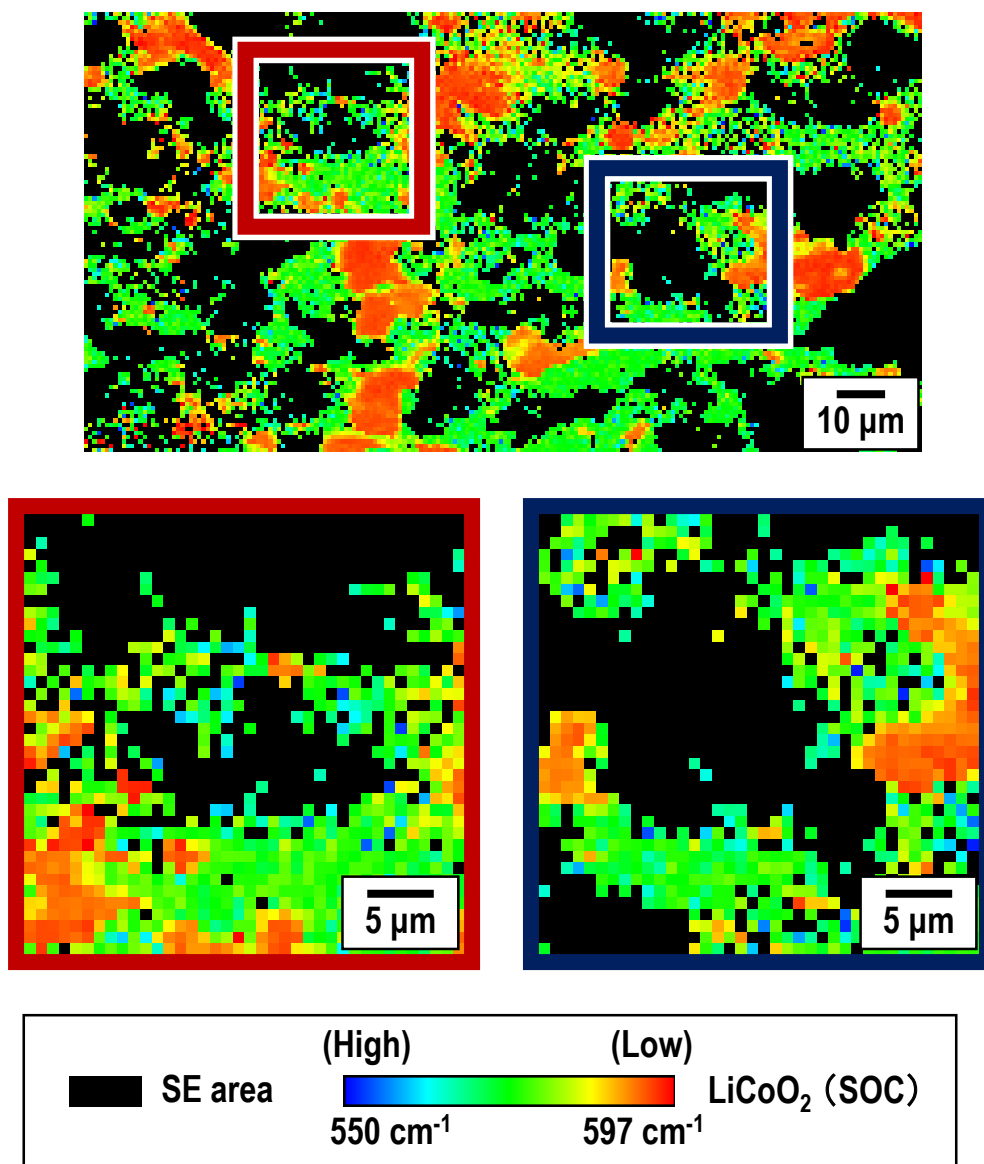

Fig. S4 Enlarged Raman mapping images of the charged  $\text{LiCoO}_2$  electrodes using larger SEs shown in Fig. 4.

## After discharge (Larger SEs)

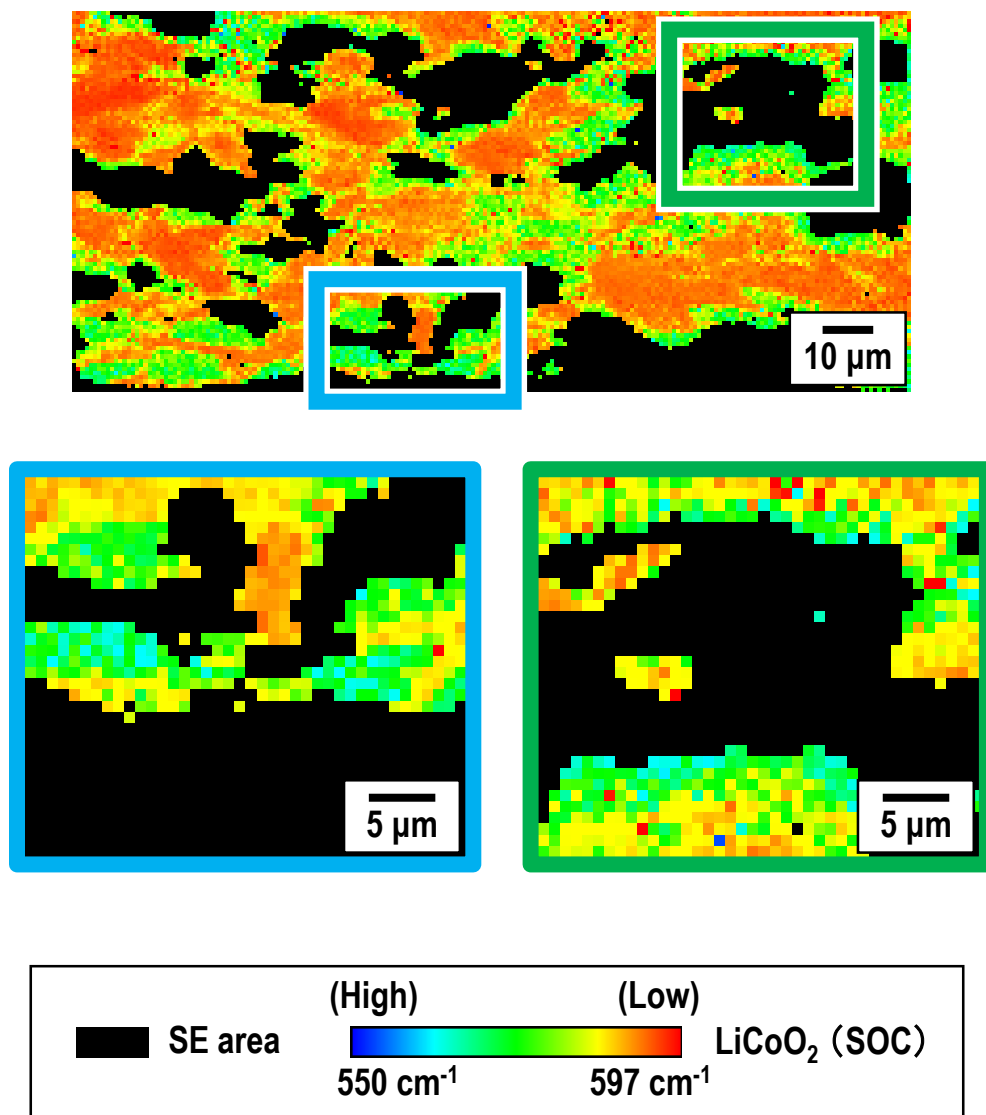

Fig. S5 Enlarged Raman mapping images of the discharged  $\text{LiCoO}_2$  electrodes using larger SEs shown in Fig. 5.
